# Supplementary material for: Biosensor-based isolation of amino acid-producing Vibrio natriegens strains
Source: PubMed Central journal article supplement — Metab Eng Commun. 2021 Nov 11;13:e00187. doi: 10.1016/j.mec.2021.e00187 (PMC8605253; doi:10.1016/j.mec.2021.e00187), 2021-11-11
Supplement: mmc4.pdf [file mmc4.pdf]

## Supplementary information

# Biosensor-based isolation of amino acid-producing *Vibrio natriegens* strains

### Author list

Roberto Giuseppe Stella<sup>1</sup>, Philipp Baumann<sup>1</sup>, Sophia Lorke<sup>1</sup>, Felix Münstermann<sup>1</sup>, Astrid Wirtz<sup>1</sup>, Johanna Wiechert<sup>1</sup>, Jan Marienhagen<sup>1,2</sup>, Julia Frunzke<sup>1#</sup>

<sup>1</sup>Institute of Bio- and Geosciences, IBG-1: Biotechnology, Forschungszentrum Jülich, Jülich, Germany

<sup>2</sup>Institute of Biotechnology, RWTH Aachen University, Worringer Weg 3, D-52074 Aachen, Germany

#Corresponding author: Prof. Dr. Julia Frunzke, [j.frunzke@fz-juelich.de](mailto:j.frunzke@fz-juelich.de)

Table S1

Oligonucleotides used in this study

| <b>name</b>           | <b>sequence</b>                                                                                  |
|-----------------------|--------------------------------------------------------------------------------------------------|
| <i>Irp_fw</i>         | tgccgggcctcttgcgggattcacacctggggcgagc                                                            |
| <i>Irp_rv</i>         | atgaagctagattccattgatcgcg                                                                        |
| <i>Irp_eYFP_fw</i>    | tgaaaaggaggagaataatctatggtagcaaggcgag                                                            |
| <i>Irp_eYFP_rv</i>    | ttgcatcaacgcatatagcgttactgtacagctcgtccatg                                                        |
| <i>PbrnFE_rv</i>      | agattattctcctctttcagcttgaatgaatcctctgc                                                           |
| <i>P100_PbrnFE_fw</i> | tcaatggaatctagcttcatagattatttctcctcttttcattgacggctagctcagtcctaggtacagtgtagcatattgcacaatagcctag   |
| <i>P101_PbrnFE_fw</i> | tcaatggaatctagcttcatagattatttctcctcttttcattacagctagctcagtcctaggtattatgtctagcatattgcacaatagcctag  |
| <i>P104_PbrnFE_fw</i> | tcaatggaatctagcttcatagattatttctcctcttttcattgacagctagctcagtcctaggtattgtctagcatattgcacaatagcctag   |
| <i>P106_PbrnFE_fw</i> | tcaatggaatctagcttcatagattatttctcctcttttcattacggctagctcagtcctaggtatagtgctagcatattgcacaatagcctag   |
| <i>P108_PbrnFE_fw</i> | tcaatggaatctagcttcatagattatttctcctcttttcactgacagctagctcagtcctaggtataatgtctagcatattgcacaatagcctag |
| <i>P110_PbrnFE_fw</i> | tcaatggaatctagcttcatagattatttctcctcttttcattacggctagctcagtcctaggtacaatgtctagcatattgcacaatagcctag  |
| <i>lysG_eYFP_fw</i>   | cactatggcgtgctgcccgggtaattaaggcgccactagtagtggtgagcaaggcgag                                       |
| <i>lysG_eYFP_rv</i>   | gagtgaacgttatctagactgtacagctcgtcc                                                                |
| <i>lysG_araC_fw</i>   | gtctagataacgtttcactccatcaaaaaaac                                                                 |
| <i>lysG_araC_rv</i>   | gcgtccggcgtagagttatgacaactgacggc                                                                 |
| <i>lysG_fw</i>        | gtcactatggcgtgctgcccctaaggcccaatccctc                                                            |
| <i>lysG_rv</i>        | tgaaaaggaggagaataatctatgaacccattcaactgg                                                          |
| <i>PlysE_100_fw</i>   | tagccgtcaatgaagctatattaacatgttaag                                                                |
| <i>PlysE_108_fw</i>   | tagctgtcagtgaaagctatattaacatgttaag                                                               |
| <i>PlysE_101_fw</i>   | tagctgtaaatgaagctatattaacatgttaag                                                                |
| <i>PlysE_106_fw</i>   | tagccgtaaatgaagctatattaacatgttaag                                                                |
| <i>PlysE_110_fw</i>   | tagccgtaaatgaagctatattaacatgttaag                                                                |
| <i>PlysE_104_fw</i>   | tagctgtcaatgaagctatattaacatgttaag                                                                |
| <i>PlysE_rv</i>       | cctcgccctgctcaccatagattatttctcctcttttcattcctaggtccgatggacag                                      |
| <i>P100_lysG_fw</i>   | agattattctcctcttttcagctagcactgtacctaggactgagctagccgtaatgaagcta                                   |
| <i>P100_lysG_rv</i>   | tagcttcattgacggctagctcagtcctaggtacagtgctagctgaaaaggaggagaataatct                                 |
| <i>P108_lysG_fw</i>   | agattattctcctcttttcagctagcattatacctaggactgagctagctgtcagtgaaagcta                                 |
| <i>P108_lysG_rv</i>   | tagcttcactgacagctagctcagtcctaggtataatgtctagctgaaaaggaggagaataatct                                |
| <i>P101_lysG_fw</i>   | agattattctcctcttttcagctagcataatacctaggactgagctagctgtaaatgaagcta                                  |
| <i>P101_lysG_rv</i>   | tagcttcattacagctagctcagtcctaggtattatgtctagctgaaaaggaggagaataatct                                 |
| <i>P106_lysG_fw</i>   | agattattctcctcttttcagctagcactatacctaggactgagctagccgtaaatgaagcta                                  |
| <i>P106_lysG_rv</i>   | tagcttcattacggctagctcagtcctaggtatagtgctagctgaaaaggaggagaataatct                                  |
| <i>P110_lysG_fw</i>   | agattattctcctcttttcagctagcattgtacctaggactgagctagccgtaaatgaagcta                                  |
| <i>P110_lysG_rv</i>   | tagcttcattacggctagctcagtcctaggtacaatgtctagctgaaaaggaggagaataatct                                 |
| <i>P104_lysG_fw</i>   | agattattctcctcttttcagctagcacaatacctaggactgagctagctgtcaatgaagcta                                  |
| <i>P104_lysG_rv</i>   | tagcttcattgacagctagctcagtcctaggtattgtctagctgaaaaggaggagaataatct                                  |

Supplementary data 1

Excel table containing the mutations identified in isolated producer mutants, with a frequency more than 50%.

Supplementary data 2

Genebank file of plasmid pBR322-J23100-Lrp-P<sub>brnFE</sub>-eYFP, all other Lrp-based biosensor plasmid used in this study were identical, except for the indicated P100 promoter regions, which was changed to the corresponding Anderson promoter sequence

Supplementary data 3

Genebank file of plasmid pBR322-J23100-LysG-P<sub>lysE</sub>-eYFP, all other LysG-based biosensor plasmid used in this study were identical, except for the indicated P100 promoter regions, which was changed to the corresponding Anderson promoter sequence
